# Supplementary material
Source: PubMed Central journal article supplement (PMC6048392)
Supplement: ajcr0008-0964-f9.pdf [file ajcr0008-0964-f9.pdf]

## Down-expression of GOLM1 inhibits cervical cancer aggressiveness

**Supplementary Table 1.** Correlation between the clinic-pathological features and expression of GOLM1

| Patient characteristics |         | GOLM1 expression |     | P-value |
|-------------------------|---------|------------------|-----|---------|
|                         |         | High             | Low |         |
| Age (years)             | ≤ 55    | 14               | 10  | 0.607   |
|                         | > 55    | 17               | 15  |         |
| FIGO (Stages)           | I, II   | 19               | 8   | < 0.01  |
|                         | III, IV | 17               | 12  |         |
| Lymph nodes metastasis  | Yes     | 21               | 12  | < 0.01  |
|                         | No      | 5                | 18  |         |
| Tumor size (cm)         | ≤ 4     | 16               | 23  | 0.291   |
|                         | > 4     | 9                | 8   |         |

**Supplementary Table 2.** qPCR primers used in this study

| Genes ( <i>Homo sapiens</i> ) | Primers | Sequences                     |
|-------------------------------|---------|-------------------------------|
| GOLM1                         | Forward | 5'-TGGCCTGCATCATCGTCTTG-3'    |
|                               | Reverse | 5'-CCCTGGAACCTCGTTCTTCTTCA-3' |
| E-cadherin                    | Forward | 5'-CGAGAGCTACACGTTACACGG-3'   |
|                               | Reverse | 5'-GGGTGTCGAGGGAAAAATAGG-3'   |
| N-cadherin                    | Forward | 5'-TTTGATGGAGGTCTCCTAACACC-3' |
|                               | Reverse | 5'-ACGTTTAACACGTTGGAAATGTG-3' |
| Vimentin                      | Forward | 5'-GCCCTAGACGAACTGGGTC-3'     |
|                               | Reverse | 5'-GGCTGCAACTGCCTAATGAG-3'    |
| TWIST1                        | Forward | 5'-GGACAAGCTGAGCAAGATTCA-3'   |
|                               | Reverse | 5'-CGGAGAAGGCGTAGCTGAG-3'     |
| MMP13                         | Forward | 5'-ACTGAGAGGCTCCGAGAAATG-3'   |
|                               | Reverse | 5'-GAACCCCGCATCTTGGCTT-3'     |
| ZEB1                          | Forward | 5'-GATGATGAATGCGAGTCAGATGC-3' |
|                               | Reverse | 5'-ACAGCAGTGTCTTGTGTTGT-3'    |
| SNAI1                         | Forward | 5'-TCGGAAGCCTAACTACAGCGA-3'   |
|                               | Reverse | 5'-AGATGAGCATTGGCAGCGAG-3'    |
| CTNND1                        | Forward | 5'-GTGACAACACGGACAGTACAG-3'   |
|                               | Reverse | 5'-TTCTTGCGGAAATCAGACCC-3'    |
| SNAI2                         | Forward | 5'-CGAACTGGACACACATACAGTG-3'  |
|                               | Reverse | 5'-CTGAGGATCTCTGGTTGTGGT-3'   |
| EGFR                          | Forward | 5'-AGGCACGAGTAACAAGCTCAC-3'   |
|                               | Reverse | 5'-ATGAGGACATAACCAGCCACC-3'   |
| CTNNB1                        | Forward | 5'-AAAGCGGCTGTTAGTCACTGG-3'   |
|                               | Reverse | 5'-CGAGTCATTGCATACTGTCCAT-3'  |
| AFP                           | Forward | 5'-CTTTGGGCTGCTCGCTATGA-3'    |
|                               | Reverse | 5'-GCATGTTGATTTAACAAGCTGCT-3' |
| KLRG1                         | Forward | 5'-TCCATGTTAGAGTTGCTACGG-3'   |
|                               | Reverse | 5'-AAGTGGAGTAGTTGGAGCCCT-3'   |
| SRC                           | Forward | 5'-GTGGACACTCAGGAGAAGAACG-3'  |
|                               | Reverse | 5'-TGCTGCTTAATAATCTTGCCCTT-3' |
| GOLPH3                        | Forward | 5'-CAAGGACCGCGAGGGTTAC-3'     |
|                               | Reverse | 5'-TTACGTCTCATTCCACAAGCC-3'   |
| CCL5                          | Forward | 5'-CCAGCAGTCGTCCTTGTGTCAC-3'  |
|                               | Reverse | 5'-CTCTGGGTTGGCACACACTT-3'    |

## Down-expression of GOLM1 inhibits cervical cancer aggressiveness

|               |         |                               |
|---------------|---------|-------------------------------|
| <i>CXCR3</i>  | Forward | 5'-CCACCTAGCTGTAGCAGACAC-3'   |
|               | Reverse | 5'-AGGGCTCCTGCGTAGAAGTT-3'    |
| <i>CXCL10</i> | Forward | 5'-GTGGCATTCAAGGAGTACCTC-3'   |
|               | Reverse | 5'-TGATGGCCTTCGATTCTGGATT-3'  |
| <i>KCNQ1</i>  | Forward | 5'-GCGTCTCCATCTACAGCACG-3'    |
|               | Reverse | 5'-GAAGTGGTAAACGAAGCATTTC-3'  |
| <i>GAPDH</i>  | Forward | 5'-TGTGGGCATCAATGGATTGG-3'    |
|               | Reverse | 5'-ACACCATGTATTCCGGGTCAATC-3' |

---
